# Supplementary material
Source: bioRxiv or medRxiv preprint supplement (http://www.medrxiv.org/highwire/filestream/72538/field_highwire_adjunct_files/3/2020.02.23.20027029-12.pdf)
Supplement: Supplementary file [file 2020.02.23.20027029-12.pdf]

Table S10

|         | <b>human</b> | <b>IGC</b> | <b>refMG</b> | <b>mOTUs</b> |
|---------|--------------|------------|--------------|--------------|
|         | Sample1      | Sample1    | Sample1      | Sample1      |
| total   | 26314385     | 26312854   | 26312854     | 88941        |
| aligned | 2596         | 25963247   | 120719       | 88941        |
| unique  | 2422         | 17167958   | 117836       | 63808        |
|         | Sample2      | Sample2    | Sample2      | Sample2      |
| total   | 16051854     | 16049997   | 16049997     | 50389        |
| aligned | 114101       | 15924216   | 80808        | 50389        |
| unique  | 113927       | 10797229   | 78811        | 37740        |
|         | Sample3      | Sample3    | Sample3      | Sample3      |
| total   | 25068577     | 25062349   | 25062349     | 78431        |
| aligned | 98569        | 24652958   | 109883       | 78431        |
| unique  | 97873        | 16626647   | 107023       | 57917        |
|         | Sample4      | Sample4    | Sample4      | Sample4      |
| total   | 19275779     | 19269926   | 19269926     | 58002        |
| aligned | 144346       | 18864061   | 90202        | 58002        |
| unique  | 144175       | 12190463   | 87788        | 44071        |
|         | Sample5      | Sample5    | Sample5      | Sample5      |
| total   | 17752109     | 17582583   | 17582583     | 43971        |
| aligned | 470580       | 17081799   | 90916        | 43971        |
| unique  | 467446       | 10876198   | 87639        | 36300        |
|         | Sample6      | Sample6    | Sample6      | Sample6      |
| total   | 20149457     | 20134881   | 20134881     | 50239        |
| aligned | 171441       | 19755057   | 109804       | 50239        |
| unique  | 171102       | 13158617   | 105762       | 43643        |
|         | Sample7      | Sample7    | Sample7      | Sample7      |
| total   | 24496959     | 24488875   | 24488875     | 85741        |
| aligned | 160138       | 24294565   | 142303       | 85741        |
| unique  | 159813       | 17657215   | 136946       | 66989        |
|         | Sample8      | Sample8    | Sample8      | Sample8      |
| total   | 22879622     | 22876338   | 22876338     | 82797        |
| aligned | 46538        | 22693337   | 125831       | 82796        |
| unique  | 45962        | 15662480   | 122859       | 63217        |
|         | Sample9      | Sample9    | Sample9      | Sample9      |
| total   | 25638773     | 25637460   | 25637460     | 103085       |
| aligned | 4688         | 25427697   | 167861       | 103085       |
| unique  | 4530         | 16297477   | 163198       | 72419        |
|         | Sample10     | Sample10   | Sample10     | Sample10     |
| total   | 18177934     | 18170545   | 18170545     | 53240        |
| aligned | 211863       | 17870029   | 97679        | 53240        |
| unique  | 211752       | 10653130   | 94695        | 39594        |
|         | Sample11     | Sample11   | Sample11     | Sample11     |
| total   | 21805187     | 21793559   | 21793559     | 73446        |
| aligned | 139907       | 21240665   | 109899       | 73446        |
| unique  | 139653       | 13466429   | 107205       | 60657        |
|         | Sample12     | Sample12   | Sample12     | Sample12     |
| total   | 23803427     | 23785667   | 23785667     | 54201        |
| aligned | 154324       | 23157227   | 119192       | 54200        |
| unique  | 153948       | 14421383   | 114639       | 42346        |
|         | Sample13     | Sample13   | Sample13     | Sample13     |

Table S10

|         | <b>human</b> | <b>IGC</b> | <b>refMG</b> | <b>mOTUs</b> |
|---------|--------------|------------|--------------|--------------|
| total   | 19367561     | 19366968   | 19366968     | 51091        |
| aligned | 1491         | 19116933   | 102296       | 51091        |
| unique  | 1384         | 11929735   | 99240        | 38555        |
|         | Sample14     | Sample14   | Sample14     | Sample14     |
| total   | 21642670     | 21614167   | 21614167     | 66192        |
| aligned | 169452       | 21303943   | 115456       | 66192        |
| unique  | 168770       | 14481836   | 111744       | 55250        |
|         | Sample15     | Sample15   | Sample15     | Sample15     |
| total   | 21297628     | 21295632   | 21295632     | 64142        |
| aligned | 13096        | 21018557   | 117978       | 64142        |
| unique  | 12853        | 13747949   | 114936       | 51323        |
|         | Sample16     | Sample16   | Sample16     | Sample16     |
| total   | 18255370     | 18179574   | 18179574     | 42907        |
| aligned | 204056       | 17853979   | 88728        | 42907        |
| unique  | 202764       | 10847071   | 85136        | 31727        |
|         | Sample17     | Sample17   | Sample17     | Sample17     |
| total   | 20046726     | 20039806   | 20039806     | 67329        |
| aligned | 124483       | 19744208   | 98823        | 67329        |
| unique  | 124261       | 12594590   | 95843        | 50216        |
|         | Sample18     | Sample18   | Sample18     | Sample18     |
| total   | 21594749     | 21590872   | 21590872     | 80348        |
| aligned | 33463        | 21271876   | 136955       | 80348        |
| unique  | 33234        | 13306581   | 134284       | 70761        |
|         | Sample19     | Sample19   | Sample19     | Sample19     |
| total   | 22002076     | 21995148   | 21995148     | 82549        |
| aligned | 252784       | 21769867   | 119321       | 82543        |
| unique  | 252213       | 15920388   | 115357       | 62075        |
|         | Sample20     | Sample20   | Sample20     | Sample20     |
| total   | 20333960     | 20260910   | 20260910     | 106229       |
| aligned | 339954       | 19586035   | 137396       | 106229       |
| unique  | 338584       | 14424180   | 131700       | 77270        |
|         | Sample21     | Sample21   | Sample21     | Sample21     |
| total   | 20909425     | 20907557   | 20907557     | 85493        |
| aligned | 94444        | 20656555   | 134871       | 85493        |
| unique  | 92806        | 15847957   | 132002       | 68265        |
|         | Sample22     | Sample22   | Sample22     | Sample22     |
| total   | 21008679     | 20978255   | 20978255     | 47516        |
| aligned | 134904       | 20405146   | 94635        | 47516        |
| unique  | 134222       | 13016370   | 90688        | 38791        |
|         | Sample23     | Sample23   | Sample23     | Sample23     |
| total   | 23322678     | 23276144   | 23276144     | 57099        |
| aligned | 212398       | 22413673   | 108792       | 57099        |
| unique  | 211584       | 14585902   | 105034       | 44169        |
|         | Sample24     | Sample24   | Sample24     | Sample24     |
| total   | 22037209     | 22032588   | 22032588     | 60233        |
| aligned | 150844       | 21531498   | 132738       | 60233        |
| unique  | 149705       | 15960004   | 127840       | 48289        |
|         | Sample25     | Sample25   | Sample25     | Sample25     |
| total   | 21066100     | 21006548   | 21006548     | 60959        |

Table S10

|         | <b>human</b> | <b>IGC</b> | <b>refMG</b> | <b>mOTUs</b> |
|---------|--------------|------------|--------------|--------------|
| aligned | 199853       | 20462896   | 102781       | 60959        |
| unique  | 198716       | 13386874   | 98688        | 47146        |
|         | Sample26     | Sample26   | Sample26     | Sample26     |
| total   | 21758538     | 21756060   | 21756060     | 70055        |
| aligned | 20800        | 21441001   | 109147       | 70055        |
| unique  | 20608        | 14022347   | 105647       | 48811        |
|         | Sample27     | Sample27   | Sample27     | Sample27     |
| total   | 19588399     | 19580180   | 19580180     | 45229        |
| aligned | 117475       | 19341907   | 85895        | 45229        |
| unique  | 117247       | 12275555   | 82365        | 31560        |
|         | Sample28     | Sample28   | Sample28     | Sample28     |
| total   | 24557355     | 24552271   | 24552271     | 93628        |
| aligned | 98510        | 24265551   | 125966       | 93628        |
| unique  | 98061        | 16604352   | 122932       | 70872        |
|         | Sample29     | Sample29   | Sample29     | Sample29     |
| total   | 21747182     | 21745344   | 21745344     | 70557        |
| aligned | 5090         | 21430471   | 120453       | 70557        |
| unique  | 4932         | 15131685   | 117126       | 58461        |
|         | Sample30     | Sample30   | Sample30     | Sample30     |
| total   | 19426233     | 19421331   | 19421331     | 63231        |
| aligned | 83830        | 19073273   | 95400        | 63230        |
| unique  | 83604        | 12951527   | 92318        | 50190        |
|         | Sample31     | Sample31   | Sample31     | Sample31     |
| total   | 21161296     | 21139339   | 21139339     | 59139        |
| aligned | 184838       | 20872762   | 102061       | 59139        |
| unique  | 184364       | 13308898   | 98591        | 44880        |
|         | Sample32     | Sample32   | Sample32     | Sample32     |
| total   | 23087756     | 23006014   | 23006014     | 68809        |
| aligned | 1000636      | 22268084   | 123664       | 68809        |
| unique  | 999201       | 14870754   | 119329       | 46834        |
|         | Sample33     | Sample33   | Sample33     | Sample33     |
| total   | 21714795     | 21707984   | 21707984     | 51212        |
| aligned | 825887       | 21376625   | 113174       | 51212        |
| unique  | 825686       | 14234554   | 108888       | 40218        |
|         | Sample34     | Sample34   | Sample34     | Sample34     |
| total   | 23373756     | 23362134   | 23362134     | 67503        |
| aligned | 601713       | 23123279   | 129276       | 67503        |
| unique  | 601270       | 15366828   | 125426       | 51789        |
|         | Sample35     | Sample35   | Sample35     | Sample35     |
| total   | 26677124     | 26657370   | 26657370     | 67148        |
| aligned | 827265       | 26392271   | 143063       | 67148        |
| unique  | 826864       | 17199913   | 138352       | 49547        |
|         | Sample36     | Sample36   | Sample36     | Sample36     |
| total   | 21274807     | 21252810   | 21252810     | 49468        |
| aligned | 731296       | 21001624   | 109690       | 49468        |
| unique  | 730883       | 13792041   | 105860       | 39577        |
|         | Sample37     | Sample37   | Sample37     | Sample37     |
| total   | 24649057     | 24643809   | 24643809     | 58432        |
| aligned | 456505       | 24031654   | 152364       | 58432        |

Table S10

|         | <b>human</b> | <b>IGC</b> | <b>refMG</b> | <b>mOTUs</b> |
|---------|--------------|------------|--------------|--------------|
| unique  | 456291       | 16164899   | 146083       | 43594        |
|         | Sample38     | Sample38   | Sample38     | Sample38     |
| total   | 23293808     | 23290821   | 23290821     | 65985        |
| aligned | 335785       | 22937043   | 143459       | 65985        |
| unique  | 334782       | 15660063   | 138983       | 49070        |
|         | Sample39     | Sample39   | Sample39     | Sample39     |
| total   | 21468189     | 21466474   | 21466474     | 43983        |
| aligned | 98638        | 21029715   | 139770       | 43983        |
| unique  | 96112        | 13955034   | 134635       | 33335        |
|         | Sample40     | Sample40   | Sample40     | Sample40     |
| total   | 18268837     | 18263611   | 18263611     | 47610        |
| aligned | 130410       | 17630011   | 96147        | 47609        |
| unique  | 130196       | 11522834   | 92819        | 36334        |
|         | Sample41     | Sample41   | Sample41     | Sample41     |
| total   | 19856747     | 19848227   | 19848227     | 58740        |
| aligned | 226326       | 19494448   | 114515       | 58740        |
| unique  | 226093       | 12521077   | 111708       | 48912        |
|         | Sample42     | Sample42   | Sample42     | Sample42     |
| total   | 18530191     | 18517931   | 18517931     | 50110        |
| aligned | 188574       | 18103083   | 98751        | 50110        |
| unique  | 188307       | 11259188   | 95536        | 37890        |
|         | Sample43     | Sample43   | Sample43     | Sample43     |
| total   | 18874402     | 18867996   | 18867996     | 46477        |
| aligned | 426989       | 17823136   | 106369       | 46477        |
| unique  | 426751       | 12111863   | 101477       | 31072        |
|         | Sample44     | Sample44   | Sample44     | Sample44     |
| total   | 16491046     | 16490043   | 16490043     | 35094        |
| aligned | 2980         | 16064145   | 84983        | 35094        |
| unique  | 2860         | 10528322   | 81546        | 26654        |
|         | Sample45     | Sample45   | Sample45     | Sample45     |
| total   | 21655639     | 21654839   | 21654839     | 47590        |
| aligned | 1675         | 21052080   | 118639       | 47590        |
| unique  | 1561         | 14328289   | 113608       | 35257        |
|         | Sample46     | Sample46   | Sample46     | Sample46     |
| total   | 23981006     | 23933128   | 23933128     | 83556        |
| aligned | 393687       | 23573885   | 129816       | 83556        |
| unique  | 392743       | 16174628   | 125763       | 63314        |
|         | Sample47     | Sample47   | Sample47     | Sample47     |
| total   | 20736692     | 20212312   | 20212312     | 64071        |
| aligned | 980994       | 19966483   | 107870       | 64071        |
| unique  | 971626       | 14354396   | 104440       | 49351        |
|         | Sample48     | Sample48   | Sample48     | Sample48     |
| total   | 20117427     | 20116526   | 20116526     | 67420        |
| aligned | 1770         | 19902184   | 104542       | 67420        |
| unique  | 1654         | 14457311   | 102399       | 52228        |
|         | Sample49     | Sample49   | Sample49     | Sample49     |
| total   | 20134260     | 20132567   | 20132567     | 63233        |
| aligned | 3766         | 19917433   | 123635       | 63231        |
| unique  | 3632         | 12651360   | 119912       | 47284        |

Table S10

|         | <b>human</b> | <b>IGC</b> | <b>refMG</b> | <b>mOTUs</b> |
|---------|--------------|------------|--------------|--------------|
|         | Sample50     | Sample50   | Sample50     | Sample50     |
| total   | 18423599     | 18416523   | 18416523     | 60299        |
| aligned | 259263       | 18126406   | 105868       | 60299        |
| unique  | 259014       | 12311895   | 102147       | 43633        |
|         | Sample51     | Sample51   | Sample51     | Sample51     |
| total   | 29695272     | 29689728   | 29689728     | 90277        |
| aligned | 84115        | 29353143   | 157200       | 90277        |
| unique  | 83563        | 19433213   | 151904       | 69548        |
|         | Sample52     | Sample52   | Sample52     | Sample52     |
| total   | 25174501     | 25170119   | 25170119     | 89854        |
| aligned | 89437        | 24904225   | 137105       | 89853        |
| unique  | 88452        | 17195650   | 133511       | 70517        |
|         | Sample53     | Sample53   | Sample53     | Sample53     |
| total   | 23891684     | 23891126   | 23891126     | 83721        |
| aligned | 1348         | 23647730   | 127063       | 83721        |
| unique  | 1229         | 16738364   | 123367       | 65484        |
|         | Sample54     | Sample54   | Sample54     | Sample54     |
| total   | 24185299     | 24181995   | 24181995     | 81786        |
| aligned | 16676        | 23789638   | 125613       | 81786        |
| unique  | 16398        | 15600218   | 121976       | 60492        |
|         | Sample55     | Sample55   | Sample55     | Sample55     |
| total   | 21842277     | 21763340   | 21763340     | 62863        |
| aligned | 199658       | 21537482   | 89346        | 62863        |
| unique  | 198218       | 14444259   | 86768        | 45710        |
|         | Sample56     | Sample56   | Sample56     | Sample56     |
| total   | 22214844     | 22049199   | 22049199     | 57036        |
| aligned | 779173       | 21749456   | 97496        | 57036        |
| unique  | 776037       | 16452045   | 93199        | 45478        |
|         | Sample57     | Sample57   | Sample57     | Sample57     |
| total   | 17896668     | 17893526   | 17893526     | 61063        |
| aligned | 73210        | 17719992   | 86012        | 61063        |
| unique  | 73057        | 12168486   | 83956        | 47190        |
|         | Sample58     | Sample58   | Sample58     | Sample58     |
| total   | 23643093     | 23642581   | 23642581     | 58429        |
| aligned | 1385         | 23268310   | 132128       | 58428        |
| unique  | 1269         | 15408308   | 127019       | 44356        |
|         | Sample59     | Sample59   | Sample59     | Sample59     |
| total   | 25309618     | 25192279   | 25192279     | 66497        |
| aligned | 286694       | 24569952   | 123505       | 66497        |
| unique  | 284416       | 16564575   | 118963       | 46123        |
|         | Sample60     | Sample60   | Sample60     | Sample60     |
| total   | 24743233     | 24742860   | 24742860     | 76959        |
| aligned | 1496         | 24394314   | 140344       | 76959        |
| unique  | 1413         | 16804553   | 136409       | 57215        |
|         | Sample61     | Sample61   | Sample61     | Sample61     |
| total   | 25511451     | 25479482   | 25479482     | 92416        |
| aligned | 424078       | 25029647   | 149596       | 92415        |
| unique  | 423406       | 17890785   | 144377       | 74820        |
|         | Sample62     | Sample62   | Sample62     | Sample62     |

Table S10

|         | <b>human</b> | <b>IGC</b> | <b>refMG</b> | <b>mOTUs</b> |
|---------|--------------|------------|--------------|--------------|
| total   | 19734305     | 19732836   | 19732836     | 63881        |
| aligned | 7549         | 19481852   | 107224       | 63881        |
| unique  | 7378         | 12616547   | 104187       | 48891        |
|         | Sample63     | Sample63   | Sample63     | Sample63     |
| total   | 19933825     | 19898755   | 19898755     | 58198        |
| aligned | 169200       | 19655024   | 96573        | 58198        |
| unique  | 168365       | 12381015   | 93517        | 44004        |
|         | Sample64     | Sample64   | Sample64     | Sample64     |
| total   | 17675333     | 17672422   | 17672422     | 57884        |
| aligned | 94608        | 17491926   | 89855        | 57884        |
| unique  | 94407        | 13057282   | 87885        | 47058        |
|         | Sample65     | Sample65   | Sample65     | Sample65     |
| total   | 21169773     | 21165595   | 21165595     | 70746        |
| aligned | 68778        | 20918706   | 96841        | 70746        |
| unique  | 68574        | 14499193   | 94930        | 55262        |
|         | Sample66     | Sample66   | Sample66     | Sample66     |
| total   | 22449479     | 22431361   | 22431361     | 72969        |
| aligned | 305238       | 22239082   | 105965       | 72969        |
| unique  | 304818       | 16327719   | 103046       | 59656        |
|         | Sample67     | Sample67   | Sample67     | Sample67     |
| total   | 20716349     | 20705840   | 20705840     | 52266        |
| aligned | 86938        | 20328867   | 98174        | 52266        |
| unique  | 86502        | 13478835   | 93920        | 39741        |
|         | Sample68     | Sample68   | Sample68     | Sample68     |
| total   | 21784793     | 21699010   | 21699010     | 37574        |
| aligned | 272606       | 20871335   | 89139        | 37574        |
| unique  | 271029       | 13228440   | 84702        | 27481        |
|         | Sample69     | Sample69   | Sample69     | Sample69     |
| total   | 19623571     | 19619691   | 19619691     | 43800        |
| aligned | 49399        | 19124972   | 93110        | 43799        |
| unique  | 49049        | 13606016   | 88717        | 36183        |
